# Supplementary material
Source: PubMed Central journal article supplement (PMC2453049)
Supplement: jc.2008-0106_1.pdf [file jc.2008-0106_1.pdf]

Supplemental Table I: **Repeat polymorphism genotyping.**

| <b>Gene symbol</b> | <b>Repeat polymorphism</b> | <b>Primer I</b>                      | <b>Primer II</b>              |
|--------------------|----------------------------|--------------------------------------|-------------------------------|
| <i>ESR1</i>        | (TA) <sub>n</sub>          | 6FAM-GAC GCA TGA TAT ACT TCA CC      | GCA GAA TCA AAT ATC CAG ATG   |
| <i>ESR1</i>        | (CA) <sub>n</sub>          | 6FAM-GCT AAG GAT AAC TTT CTG GTA GAC | TTC TTC ATT TTA CGG ATG G     |
| <i>ESR2</i>        | (CA) <sub>n</sub>          | HEX-GGT AAA CCA TGG TCT GTA CC       | AAC AAA ATG TTG AAT GAG TGG G |
| <i>CYP19A1</i>     | (TTTA) <sub>n</sub>        | HEX-GTC TAT GAA TAT GCC TTT TT       | GTT TGA CTC CGT GTG TTT GA    |
