# Supplementary material
Source: PubMed Central journal article supplement (PMC2453049)
Supplement: jc.2008-0106_2.pdf [file jc.2008-0106_2.pdf]

Supplemental Table II: **Adjusted circulating DHEAS levels in men by estrogen-related genotypes.**

| Gene                      | SNP                     | Genotype | N                   | DHEAS                                                |   |
|---------------------------|-------------------------|----------|---------------------|------------------------------------------------------|---|
|                           |                         |          |                     | Median<br>(25 <sup>th</sup> -75 <sup>th</sup> %-ile) | P |
| <i>ESR1</i>               | <i>(TA)<sub>n</sub></i> | L/L      | 164                 | 209.4 (170.7-254.5)                                  |   |
|                           |                         | L/S      | 338                 | 194.0 (153.5-232.4)                                  |   |
|                           |                         | S/S      | 164                 | 226.2 (178.8-264.8)                                  |   |
|                           | <i>rs2077647</i>        | T/T      | 224                 | 216.1 (171.2-256.5)                                  |   |
|                           |                         | T/C      | 408                 | 198.6 (155.9-247.7)                                  |   |
|                           |                         | C/C      | 159                 | 206.1 (164.8-250.8)                                  |   |
|                           | <i>rs2234693</i>        | T/T      | 246                 | 217.4 (169.2-260.4)                                  |   |
|                           |                         | T/C      | 400                 | 199.0 (159.4-240.6)                                  |   |
|                           |                         | C/C      | 160                 | 199.6 (163.5-243.5)                                  |   |
|                           | <i>rs9340799</i>        | A/A      | 327                 | 207.5 (164.3-250.6)                                  |   |
|                           |                         | A/G      | 378                 | 203.2 (162.7-248.4)                                  |   |
|                           |                         | G/G      | 109                 | 195.2 (159.4-242.1)                                  |   |
|                           | <i>rs1801132</i>        | C/C      | 468                 | 197.4 (154.2-239.3)                                  |   |
|                           |                         | C/G      | 269                 | 214.7 (172.7-257.6)                                  |   |
|                           |                         | G/G      | 45                  | 212.0 (181.2-269.5)                                  |   |
| <i>(CA)<sub>n</sub></i>   | S/S                     | 242      | 205.2 (163.2-245.4) |                                                      |   |
|                           | S/L                     | 297      | 200.7 (161.0-239.4) |                                                      |   |
|                           | L/L                     | 79       | 224.7 (173.9-262.1) |                                                      |   |
| <i>ESR2</i>               | <i>rs1256059</i>        | C/C      | 225                 | 212.2 (168.9-256.2)                                  |   |
|                           |                         | C/T      | 402                 | 203.8 (165.3-248.2)                                  |   |
|                           |                         | T/T      | 168                 | 201.8 (152.0-235.7)                                  |   |
|                           | <i>(CA)<sub>n</sub></i> | S/S      | 515                 | 201.2 (163.6-247.3)                                  |   |
|                           |                         | S/L      | 274                 | 203.6 (158.1-253.2)                                  |   |
|                           |                         | L/L      | 27                  | 228.9 (187.3-280.5)                                  |   |
| <i>CYP19A1</i>            | <i>rs1256031</i>        | T/T      | 213                 | 217.2 (173.1-256.7)                                  |   |
|                           |                         | T/C      | 403                 | 199.4 (158.6-245.5)                                  |   |
|                           |                         | C/C      | 194                 | 208.6 (159.2-242.8)                                  |   |
|                           | <i>rs700518</i>         | G/G      | 210                 | 225.6 (181.7-265.1)                                  |   |
|                           |                         | G/A      | 305                 | 205.0 (163.0-251.8)                                  |   |
|                           |                         | A/A      | 161                 | 206.4 (158.0-251.9)                                  |   |
| <i>(TTTA)<sub>n</sub></i> | S/S                     | 190      | 225.7 (180.3-276.0) |                                                      |   |
|                           | S/L                     | 331      | 202.3 (163.1-247.2) |                                                      |   |
|                           | L/L                     | 167      | 190.9 (152.4-240.9) |                                                      |   |
| <i>rs726547</i>           | C/C                     | 713      | 202.4 (160.7-243.8) |                                                      |   |
|                           | C/T                     | 85       | 227.4 (181.2-281.1) |                                                      |   |

Adjusted for age, weight, smoking, and alcohol consumption.
