# Supplementary material
Source: PubMed Central journal article supplement (PMC2453049)
Supplement: jc.2008-0106_3.pdf [file jc.2008-0106_3.pdf]

Supplemental Table III: Adjusted circulating DHEAS levels in women by menopausal status and estrogen-related genotypes.

| Gene                    | SNP                       | Genotype | N                   | Premenopausal DHEAS                               |     | N                   | Postmenopausal DHEAS                              |   |
|-------------------------|---------------------------|----------|---------------------|---------------------------------------------------|-----|---------------------|---------------------------------------------------|---|
|                         |                           |          |                     | Median (25 <sup>th</sup> -75 <sup>th</sup> %-ile) | P   |                     | Median (25 <sup>th</sup> -75 <sup>th</sup> %-ile) | P |
| <i>ESR1</i>             | <i>(TA)<sub>n</sub></i>   | L/L      | 79                  | 158.5 (139.0-187.2)                               |     | 67                  | 111.8 (94.54-134.3)                               |   |
|                         |                           | L/S      | 134                 | 144.9 (124.7-166.7)                               |     | 149                 | 96.9 (82.99-110.9)                                |   |
|                         |                           | S/S      | 68                  | 146.1 (128.5-175.7)                               |     | 73                  | 112.3 (88.24-127.3)                               |   |
|                         | <i>rs2077647</i>          | T/T      | 98                  | 146.0 (131.1-167.4)                               |     | 92                  | 109.7 (88.15-123.7)                               |   |
|                         |                           | T/C      | 166                 | 145.3 (130.1-163.9)                               |     | 171                 | 97.6 (84.01-114.9)                                |   |
|                         |                           | C/C      | 66                  | 158.3 (143.1-177.1)                               |     | 59                  | 97.6 (78.99-120.6)                                |   |
|                         | <i>rs2234693</i>          | T/T      | 100                 | 144.4 (129.9-162.2)                               |     | 97                  | 102.2 (81.12-117.4)                               |   |
|                         |                           | T/C      | 155                 | 151.4 (137.2-171.9)                               |     | 172                 | 100.9 (86.62-116.2)                               |   |
|                         |                           | C/C      | 78                  | 143.9 (130.7-166.4)                               |     | 60                  | 107.4 (88.61-122.3)                               |   |
|                         | <i>rs9340799</i>          | A/A      | 143                 | 141.8 (127.6-162.4)                               |     | 131                 | 99.8 (83.25-113.2)                                |   |
|                         |                           | A/G      | 148                 | 157.4 (141.8-179.1)                               |     | 163                 | 102.9 (86.78-118.6)                               |   |
|                         |                           | G/G      | 42                  | 138.2 (120.9-156.1)                               |     | 37                  | 102.5 (87.46-135.1)                               |   |
|                         | <i>rs1801132</i>          | C/C      | 188                 | 149.6 (135.2-170.1)                               |     | 194                 | 101.3 (85.92-118.0)                               |   |
|                         |                           | C/G      | 116                 | 145.9 (133.1-172.4)                               |     | 101                 | 104.5 (84.58-118.0)                               |   |
|                         |                           | G/G      | 21                  | 138.1 (122.5-153.0)                               |     | 21                  | 101.0 (85.50-113.4)                               |   |
| <i>(CA)<sub>n</sub></i> | S/S                       | 109      | 153.1 (136.7-175.5) |                                                   | 126 | 101.4 (83.68-117.5) |                                                   |   |
|                         | S/L                       | 115      | 143.7 (123.1-171.0) |                                                   | 115 | 106.0 (88.80-118.6) |                                                   |   |
|                         | L/L                       | 37       | 144.9 (128.7-174.5) |                                                   | 40  | 119.6 (100.3-147.7) |                                                   |   |
| <i>ESR2</i>             | <i>rs1256059</i>          | C/C      | 114                 | 132.1 (122.9-152.7)                               |     | 102                 | 102.6 (83.57-120.6)                               |   |
|                         |                           | C/T      | 149                 | 162.6 (144.6-180.6)                               |     | 163                 | 100.6 (80.44-113.9)                               |   |
|                         |                           | T/T      | 63                  | 155.3 (139.9-182.2)                               |     | 56                  | 110.4 (97.27-137.3)                               |   |
|                         | <i>(CA)<sub>n</sub></i>   | S/S      | 199                 | 148.9 (131.5-176.2)                               |     | 213                 | 100.7 (86.37-115.4)                               |   |
|                         |                           | S/L      | 119                 | 146.7 (133.6-169.1)                               |     | 107                 | 104.6 (83.47-122.6)                               |   |
|                         |                           | L/L      | 18                  | 150.1 (137.8-170.4)                               |     | 17                  | 113.5 (87.74-145.4)                               |   |
| <i>rs1256031</i>        | T/T                       | 95       | 136.8 (125.4-160.8) |                                                   | 99  | 105.8 (87.11-122.0) |                                                   |   |
|                         | T/C                       | 156      | 154.0 (135.7-173.7) |                                                   | 158 | 96.9 (78.25-112.0)  |                                                   |   |
|                         | C/C                       | 85       | 152.8 (138.0-172.3) |                                                   | 74  | 109.1 (98.50-132.4) |                                                   |   |
| <i>CYP19A1</i>          | <i>rs700518</i>           | G/G      | 89                  | 149.2 (134.1-167.8)                               |     | 72                  | 92.23 (75.74-106.3)                               |   |
|                         |                           | G/A      | 116                 | 146.2 (132.3-164.0)                               |     | 138                 | 103.0 (90.19-125.9)                               |   |
|                         |                           | A/A      | 68                  | 163.5 (148.1-183.2)                               |     | 72                  | 99.79 (83.34-111.8)                               |   |
|                         | <i>(TTTA)<sub>n</sub></i> | S/S      | 73                  | 145.6 (128.1-162.6)                               |     | 71                  | 91.49 (74.67-106.3)                               |   |
|                         |                           | S/L      | 142                 | 147.8 (132.2-174.3)                               |     | 154                 | 109.6 (91.12-124.1)                               |   |
|                         |                           | L/L      | 70                  | 170.7 (147.7-189.8)                               |     | 64                  | 101.8 (86.74-115.5)                               |   |
|                         | <i>rs726547</i>           | C/C      | 290                 | 152.3 (136.6-171.3)                               |     | 290                 | 103.2 (87.60-117.5)                               |   |
| C/T                     |                           | 37       | 131.5 (120.2-149.0) |                                                   | 33  | 90.78 (74.00-102.7) |                                                   |   |
|                         |                           | T/T      | 2                   | 71.15 (66.16-76.13)                               |     | 1                   | 198.5 (198.5-198.5)                               |   |

Adjusted for age, weight, smoking, and alcohol consumption.
