# Supplementary material
Source: PubMed Central journal article supplement (PMC2453049)
Supplement: jc.2008-0106_4.pdf [file jc.2008-0106_4.pdf]

Supplemental Table IV: Univariate associations between estrogen-related genotypes and steroid-hormone-level covariates by gender and menopausal status.

| Trait                                   | Men              |                  |                  | P           | Premenopausal women |                  |                 | P    | Postmenopausal women |                  |                 | P            |
|-----------------------------------------|------------------|------------------|------------------|-------------|---------------------|------------------|-----------------|------|----------------------|------------------|-----------------|--------------|
|                                         | Mean±SD          |                  |                  |             | Mean±SD             |                  |                 |      | Mean±SD              |                  |                 |              |
| <b><i>CYP19A1 rs700518</i></b>          | <b>G/G (212)</b> | <b>G/A (307)</b> | <b>A/A (162)</b> |             | <b>G/G (89)</b>     | <b>G/A (116)</b> | <b>A/A (68)</b> |      | <b>G/G (72)</b>      | <b>G/A (138)</b> | <b>A/A (72)</b> |              |
| Age, years                              | 49±9             | 51±10            | 51±10            | 0.07        | 43±6                | 42±6             | 42±5            | 0.60 | 58±6                 | 57±7             | 58±6            | 0.12         |
| Physical activity score*                | 37±8             | 39±7             | 36±7             | 0.09        | 36±7                | 38±8             | 38±10           | 0.69 | 38±8                 | 37±8             | 36±7            | 0.36         |
| BMI, kg/m <sup>2</sup>                  | 28±4             | 28±4             | 27±3             | 0.75        | 26±6                | 25±5             | 25±5            | 0.37 | 25±5                 | 26±6             | 28±5            | <b>0.005</b> |
| Smoking, %                              | 28               | 23               | 24               | 0.40        | 31                  | 24               | 28              | 0.51 | 24                   | 29               | 24              | 0.59         |
| Alcohol, oz/week                        | 4±4              | 4±5              | 4±5              | 0.39        | 2±2                 | 2±3              | 2±3             | 0.59 | 2±3                  | 2±3              | 2±2             | 0.11         |
| <b><i>CYP19A1 (TTA)<sub>n</sub></i></b> | <b>S/S (192)</b> | <b>S/L (333)</b> | <b>L/L (168)</b> |             | <b>S/S (73)</b>     | <b>S/L (142)</b> | <b>L/L (70)</b> |      | <b>S/S (71)</b>      | <b>S/L (154)</b> | <b>L/L (64)</b> |              |
| Age, years                              | 49±10            | 52±10            | 51±10            | <b>0.03</b> | 43±6                | 42±6             | 42±5            | 0.71 | 58±6                 | 57±6             | 57±6            | 0.29         |
| Physical activity score*                | 37±7             | 38±7             | 36±7             | 0.08        | 37±6                | 38±9             | 38±9            | 0.96 | 36±7                 | 37±8             | 39±9            | 0.13         |
| BMI, kg/m <sup>2</sup>                  | 28±4             | 28±4             | 27±3             | 0.80        | 26±7                | 25±5             | 26±6            | 0.80 | 28±5                 | 26±5             | 27±6            | 0.05         |
| Smoking, %                              | 30               | 24               | 28               | 0.31        | 36                  | 29               | 29              | 0.55 | 30                   | 25               | 23              | 0.70         |
| Alcohol, oz/week                        | 4±4              | 4±5              | 4±5              | 0.83        | 1±2                 | 2±3              | 2±4             | 0.34 | 2±2                  | 2±3              | 2±3             | 0.29         |
| <b><i>CYP19A1 rs726547</i></b>          | <b>C/C (719)</b> | <b>C/T (85)</b>  | <b>T/T (0)</b>   |             | <b>C/C (290)</b>    | <b>C/T (37)</b>  | <b>T/T (2)</b>  |      | <b>C/C (290)</b>     | <b>C/T (33)</b>  | <b>T/T (1)</b>  |              |
| Age, years                              | 51±10            | 49±10            | -                | 0.10        | 43±6                | 43±6             | 38±5            | 0.36 | 57±6                 | 58±7             | 54±.            | 0.43         |
| Physical activity score*                | 37±7             | 38±8             | -                | 0.28        | 37±8                | 39±9             | 31±.            | 0.39 | 38±8                 | 36±8             | 32±.            | 0.39         |
| BMI, kg/m <sup>2</sup>                  | 28±4             | 28±4             | -                | 0.70        | 25±6                | 24±3             | 23±2            | 0.60 | 27±6                 | 26±5             | 26±.            | 0.87         |
| Smoking, %                              | 26               | 20               | -                | 0.20        | 31                  | 16               | 50              | 0.15 | 26                   | 24               | 100             | 0.24         |
| Alcohol, oz/week                        | 4±5              | 4±5              | -                | 0.43        | 2±3                 | 2±2              | 1±1             | 0.52 | 2±3                  | 2±2              | 0±.             | 0.45         |
| <b><i>ESR1 (TA)<sub>n</sub></i></b>     | <b>L/L (165)</b> | <b>L/S (338)</b> | <b>S/S (167)</b> |             | <b>L/L (79)</b>     | <b>L/S (134)</b> | <b>S/S (68)</b> |      | <b>L/L (67)</b>      | <b>L/S (149)</b> | <b>S/S (73)</b> |              |
| Age, years                              | 51±9             | 51±10            | 50±9             | 0.32        | 43±5                | 42±6             | 42±6            | 0.45 | 57±7                 | 57±6             | 57±6            | 0.67         |
| Physical activity score*                | 37±7             | 37±7             | 37±8             | 0.61        | 38±7                | 36±7             | 38±7            | 0.14 | 36±7                 | 37±7             | 37±8            | 0.36         |
| BMI, kg/m <sup>2</sup>                  | 28±4             | 28±4             | 28±3             | 0.82        | 26±7                | 25±4             | 25±5            | 0.30 | 27±6                 | 26±5             | 27±5            | 0.57         |
| Smoking, %                              | 26               | 25               | 24               | 0.90        | 23                  | 31               | 29              | 0.45 | 30                   | 25               | 31              | 0.53         |
| Alcohol, oz/week                        | 4±4              | 4±5              | 4±4              | 0.19        | 2±3                 | 2±4              | 2±2             | 0.78 | 2±3                  | 2±2              | 2±3             | 0.41         |

|                              |                  |                  |                  |              |                  |                  |                 |      |                  |                  |                 |              |
|------------------------------|------------------|------------------|------------------|--------------|------------------|------------------|-----------------|------|------------------|------------------|-----------------|--------------|
| <b>ESRI rs2077647</b>        | <b>T/T (227)</b> | <b>T/C (409)</b> | <b>C/C (161)</b> |              | <b>T/T (98)</b>  | <b>T/C (166)</b> | <b>C/C (66)</b> |      | <b>T/T (92)</b>  | <b>T/C (171)</b> | <b>C/C (59)</b> |              |
| Age, years                   | 50±9             | 51±10            | 51±9             | 0.88         | 43±6             | 42±6             | 43±5            | 0.60 | 57±6             | 57±6             | 58±7            | 0.97         |
| Physical activity score*     | 37±8             | 37±7             | 37±7             | 0.79         | 38±8             | 37±8             | 37±7            | 0.56 | 37±8             | 37±8             | 36±7            | 0.57         |
| BMI, kg/m <sup>2</sup>       | 28±3             | 28±4             | 28±4             | 0.72         | 25±5             | 25±5             | 26±6            | 0.83 | 27±6             | 26±5             | 28±5            | 0.20         |
| Smoking, %                   | 26               | 25               | 27               | 0.76         | 28               | 32               | 23              | 0.36 | 28               | 23               | 31              | 0.48         |
| Alcohol, oz/week             | 4±4              | 5±6              | 4±5              | 0.33         | 2±2              | 2±4              | 2±3             | 0.78 | 2±3              | 2±3              | 2±3             | 0.66         |
| <b>ESRI rs2234693</b>        | <b>T/T (249)</b> | <b>T/C (401)</b> | <b>C/C (162)</b> |              | <b>T/T (100)</b> | <b>T/C (155)</b> | <b>C/C (78)</b> |      | <b>T/T (97)</b>  | <b>T/C (172)</b> | <b>C/C (60)</b> |              |
| Age, years                   | 50±10            | 51±10            | 51±9             | 0.86         | 43±5             | 42±6             | 43±5            | 0.62 | 57±6             | 57±6             | 57±7            | 0.83         |
| Physical activity score*     | 37±8             | 37±7             | 38±7             | 0.28         | 37±8             | 37±8             | 38±7            | 0.29 | 38±9             | 37±7             | 35±7            | 0.14         |
| BMI, kg/m <sup>2</sup>       | 28±3             | 28±4             | 28±4             | 0.97         | 25±5             | 25±5             | 26±6            | 0.57 | 27±5             | 26±5             | 27±6            | 0.42         |
| Smoking, %                   | 28               | 24               | 25               | 0.56         | 20               | 30               | 29              | 0.99 | 28               | 22               | 37              | 0.06         |
| Alcohol, oz/week             | 4±5              | 4±5              | 4±5              | 0.63         | 2±2              | 2±4              | 2±3             | 0.43 | 2±3              | 2±2              | 2±3             | 0.69         |
| <b>ESRI rs9340799</b>        | <b>A/A (330)</b> | <b>A/G (379)</b> | <b>G/G (111)</b> |              | <b>A/A (143)</b> | <b>A/G (148)</b> | <b>G/G (42)</b> |      | <b>A/A (131)</b> | <b>A/G (163)</b> | <b>G/G (37)</b> |              |
| Age, years                   | 50±10            | 51±10            | 51±9             | 0.87         | 43±5             | 42±6             | 43±5            | 0.90 | 57±6             | 57±7             | 57±7            | 0.87         |
| Physical activity score*     | 37±8             | 37±7             | 38±8             | 0.57         | 37±8             | 37±8             | 38±8            | 0.69 | 38±9             | 37±8             | 35±5            | 0.48         |
| BMI, kg/m <sup>2</sup>       | 28±4             | 28±4             | 27±3             | 0.28         | 25±5             | 25±5             | 26±8            | 0.95 | 27±5             | 26±5             | 26±6            | 0.99         |
| Smoking, %                   | 28               | 24               | 27               | 0.47         | 29               | 32               | 29              | 0.83 | 28               | 19               | 46              | <b>0.002</b> |
| Alcohol, oz/week             | 4±5              | 5±5              | 4±4              | 0.21         | 2±2              | 2±2              | 2±3             | 0.78 | 2±3              | 2±3              | 2±3             | 0.30         |
| <b>ESRI rs1801132</b>        | <b>C/C (471)</b> | <b>C/G (272)</b> | <b>G/G (45)</b>  |              | <b>C/C (188)</b> | <b>C/G (116)</b> | <b>G/G (21)</b> |      | <b>C/C (194)</b> | <b>C/G (101)</b> | <b>G/G (21)</b> |              |
| Age, years                   | 51±10            | 50±9             | 50±10            | 0.68         | 42±6             | 43±6             | 44±6            | 0.45 | 57±7             | 57±6             | 57±8            | 0.54         |
| Physical activity score*     | 37±6             | 38±9             | 36±8             | 0.29         | 37±7             | 37±9             | 37±9            | 0.67 | 37±8             | 37±7             | 37±9            | 0.80         |
| BMI, kg/m <sup>2</sup>       | 28±4             | 27±4             | 27±4             | <b>0.005</b> | 25±6             | 25±5             | 25±5            | 0.80 | 26±5             | 26±5             | 28±7            | 0.40         |
| Smoking, %                   | 22               | 28               | 24               | 0.36         | 31               | 28               | 24              | 0.76 | 25               | 30               | 19              | 0.53         |
| Alcohol, oz/week             | 4±6              | 4±5              | 4±4              | 0.60         | 2±4              | 2±2              | 1±1             | 0.74 | 2±3              | 2±3              | 2±2             | 0.69         |
| <b>ESRI (CA)<sub>n</sub></b> | <b>S/S (244)</b> | <b>S/L (298)</b> | <b>L/L (79)</b>  |              | <b>S/S (109)</b> | <b>S/L (115)</b> | <b>L/L (37)</b> |      | <b>S/S (126)</b> | <b>S/L (115)</b> | <b>L/L (40)</b> |              |
| Age, years                   | 51±10            | 51±10            | 51±10            | 0.99         | 42±6             | 42±6             | 42±6            | 0.84 | 58±6             | 57±6             | 56±7            | 0.21         |
| Physical activity score*     | 37±7             | 38±8             | 35±7             | <b>0.04</b>  | 38±7             | 37±8             | 35±4            | 0.26 | 38±8             | 36±6             | 35±8            | 0.09         |
| BMI, kg/m <sup>2</sup>       | 28±4             | 28±3             | 28±4             | 0.61         | 25±6             | 24±4             | 27±7            | 0.07 | 26±5             | 27±6             | 27±6            | 0.67         |
| Smoking, %                   | 26               | 26               | 28               | 0.93         | 28               | 25               | 27              | 0.86 | 27               | 23               | 42              | 0.07         |
| Alcohol, oz/week             | 4±4              | 4±5              | 5±5              | 0.51         | 2±4              | 2±3              | 1±2             | 0.86 | 2±3              | 2±3              | 2±2             | 0.39         |

|                                     |                  |                  |                  |      |                  |                  |                 |             |                  |                  |                 |              |
|-------------------------------------|------------------|------------------|------------------|------|------------------|------------------|-----------------|-------------|------------------|------------------|-----------------|--------------|
| <b><i>ESR2 rs1256059</i></b>        | <b>C/C (226)</b> | <b>C/T (405)</b> | <b>T/T (169)</b> |      | <b>C/C (114)</b> | <b>C/T (149)</b> | <b>T/T (63)</b> |             | <b>C/C (102)</b> | <b>C/T (163)</b> | <b>T/T (56)</b> |              |
| Age, years                          | 51±10            | 50±10            | 51±10            | 0.96 | 42±6             | 42±6             | 43±5            | 0.38        | 58±6             | 58±6             | 55±6            | <b>0.007</b> |
| Physical activity score*            | 37±7             | 37±7             | 37±8             | 0.95 | 38±8             | 36±8             | 38±8            | 0.15        | 39±9             | 37±8             | 37±7            | 0.14         |
| BMI, kg/m <sup>2</sup>              | 28±4             | 28±4             | 27±4             | 0.38 | 25±5             | 25±6             | 26±6            | 0.37        | 27±6             | 26±5             | 26±5            | 0.70         |
| Smoking, %                          | 25               | 26               | 27               | 0.90 | 31               | 28               | 37              | 0.49        | 25               | 28               | 29              | 0.77         |
| Alcohol, oz/week                    | 4±6              | 4±4              | 5±5              | 0.46 | 2±2              | 2±3              | 2±5             | 0.81        | 2±3              | 2±2              | 3±4             | 0.41         |
| <b><i>ESR2 (CA)<sub>n</sub></i></b> | <b>S/S (518)</b> | <b>S/L (276)</b> | <b>L/L (27)</b>  |      | <b>S/S (199)</b> | <b>S/L (119)</b> | <b>L/L (18)</b> |             | <b>S/S (213)</b> | <b>S/L (107)</b> | <b>L/L (17)</b> |              |
| Age, years                          | 51±10            | 50±10            | 48±8             | 0.24 | 42±6             | 43±5             | 44±4            | <b>0.04</b> | 57±6             | 57±7             | 56±7            | 0.54         |
| Physical activity score*            | 37±7             | 37±7             | 37±6             | 0.68 | 37±7             | 37±8             | 34±8            | 0.12        | 36±7             | 38±9             | 38±9            | 0.25         |
| BMI, kg/m <sup>2</sup>              | 27±4             | 28±4             | 28±4             | 0.06 | 25±5             | 25±6             | 26±6            | 0.19        | 27±5             | 27±5             | 26±4            | 0.75         |
| Smoking, %                          | 24               | 26               | 33               | 0.48 | 31               | 26               | 28              | 0.62        | 28               | 21               | 35              | 0.25         |
| Alcohol, oz/week                    | 4±5              | 4±5              | 4±5              | 0.70 | 2±3              | 2±4              | 2±2             | 0.87        | 2±3              | 2±3              | 3±3             | 0.38         |
| <b><i>ESR2 rs1256031</i></b>        | <b>T/T (214)</b> | <b>T/C (406)</b> | <b>C/C (196)</b> |      | <b>T/T (95)</b>  | <b>T/C (156)</b> | <b>C/C (85)</b> |             | <b>T/T (99)</b>  | <b>T/C (158)</b> | <b>C/C (74)</b> |              |
| Age, years                          | 50±9             | 51±10            | 50±10            | 0.83 | 42±6             | 42±6             | 43±5            | 0.31        | 58±6             | 58±6             | 55±6            | <b>0.01</b>  |
| Physical activity score*            | 37±7             | 37±7             | 37±8             | 0.60 | 37±8             | 36±7             | 39±9            | 0.24        | 39±9             | 36±8             | 37±7            | 0.16         |
| BMI, kg/m <sup>2</sup>              | 28±4             | 28±4             | 28±4             | 0.32 | 25±4             | 25±6             | 26±6            | 0.26        | 27±6             | 27±5             | 26±5            | 0.69         |
| Smoking, %                          | 25               | 26               | 27               | 0.91 | 31               | 28               | 29              | 0.92        | 26               | 27               | 26              | 0.99         |
| Alcohol, oz/week                    | 4±6              | 4±4              | 4±5              | 0.68 | 2±2              | 2±2              | 2±5             | 0.87        | 2±3              | 2±2              | 3±4             | 0.54         |

\* - was calculated as the number of hours spent doing certain activity multiplied by a coefficient of estimated oxygen consumption for each activity (see Material and Methods).
